# Supplementary material
Source: PubMed Central journal article supplement (PMC7219530)
Supplement: NIHMS981142-supplement-Supplemental_Data_File___doc___tif__pdf__etc___3.pdf [file NIHMS981142-supplement-Supplemental_Data_File___doc___tif__pdf__etc___3.pdf]

Supplementary Table 2. Prevalence of Laryngeal Injury by Average Intubation Duration and Reported Symptoms.

| STUDY REFERENCE NUMBER                                                                                                 | Raw Study Data by Average Duration of Intubation |    |    |      |             |    |    |     |          |    |      | Summary Data by Average Duration of Intubation |     |            |             |         |            |          |    |            |  |  |  |
|------------------------------------------------------------------------------------------------------------------------|--------------------------------------------------|----|----|------|-------------|----|----|-----|----------|----|------|------------------------------------------------|-----|------------|-------------|---------|------------|----------|----|------------|--|--|--|
|                                                                                                                        | <5 days                                          |    |    |      | 5 - 10 days |    |    |     | >10 days |    |      | <5 days                                        |     |            | 5 - 10 days |         |            | >10 days |    |            |  |  |  |
|                                                                                                                        | 30                                               | 37 | 50 | 55-1 | 16          | 28 | 41 | 46  | 55-2     | 52 | 55-3 | Count                                          | n   | Prevalence | Count       | n       | Prevalence | Count    | n  | Prevalence |  |  |  |
| N                                                                                                                      | 209                                              | 51 | 32 | 50   | 61          | 19 | 51 | 136 | 100      | 16 | 50   | N = 342                                        |     |            |             | N = 367 |            |          |    | N = 66     |  |  |  |
| <b>GRADE 0</b>                                                                                                         |                                                  |    |    |      |             |    |    |     |          |    |      |                                                |     |            |             |         |            |          |    |            |  |  |  |
| <b>No injury present</b>                                                                                               |                                                  |    |    |      |             |    |    |     |          |    |      |                                                |     |            |             |         |            |          |    |            |  |  |  |
| no injury                                                                                                              | 42                                               | 10 |    |      | 0           | 3  | 3  | 36  |          | 0  |      | 52                                             | 260 | 20%        | 42          | 267     | 16%        | 0        | 16 | 0%         |  |  |  |
| <b>GRADE I</b>                                                                                                         |                                                  |    |    |      |             |    |    |     |          |    |      |                                                |     |            |             |         |            |          |    |            |  |  |  |
| <b>Self-limited, soft tissue (e.g., edema, erythema, hyperplasia, ecchymosis)</b>                                      |                                                  |    |    |      |             |    |    |     |          |    |      |                                                |     |            |             |         |            |          |    |            |  |  |  |
| arytenoid edema                                                                                                        |                                                  | 12 | 21 |      | 58          |    | 48 |     |          |    |      | 33                                             | 83  | 40%        | 106         | 112     | 95%        |          |    |            |  |  |  |
| edema                                                                                                                  | 135                                              |    | 29 |      | 40          |    | 39 | 74  |          |    |      | 164                                            | 241 | 68%        | 153         | 248     | 62%        |          |    |            |  |  |  |
| erythema                                                                                                               |                                                  | 25 | 22 |      | 54          |    | 43 |     |          |    |      | 47                                             | 83  | 57%        | 97          | 112     | 87%        |          |    |            |  |  |  |
| interarytenoid edema                                                                                                   |                                                  |    |    |      | 58          |    | 48 |     |          |    |      |                                                |     |            | 106         | 112     | 95%        |          |    |            |  |  |  |
| interarytenoid erythema                                                                                                |                                                  |    |    |      | 59          |    | 49 |     |          |    |      |                                                |     |            | 108         | 112     | 96%        |          |    |            |  |  |  |
| post-cricoid edema                                                                                                     |                                                  |    | 21 |      |             |    |    |     |          |    |      | 21                                             | 32  | 66%        |             |         |            |          |    |            |  |  |  |
| <b>TOTALS</b>                                                                                                          |                                                  |    |    |      |             |    |    |     |          |    |      | 265                                            | 439 | 60%        | 570         | 696     | 82%        | -        | -  | -          |  |  |  |
| <b>GRADE II</b>                                                                                                        |                                                  |    |    |      |             |    |    |     |          |    |      |                                                |     |            |             |         |            |          |    |            |  |  |  |
| <b>Hematoma, ulceration, fibrin without glottis narrowing, mass lesion, granulation</b>                                |                                                  |    |    |      |             |    |    |     |          |    |      |                                                |     |            |             |         |            |          |    |            |  |  |  |
| granuloma/granulation                                                                                                  |                                                  | 4  |    |      | 32          | 8  | 27 | 15  |          |    |      | 4                                              | 51  | 8%         | 82          | 267     | 31%        |          |    |            |  |  |  |
| ulceration                                                                                                             | 65                                               |    | 1  |      |             | 7  |    | 45  |          | 16 |      | 66                                             | 241 | 27%        | 52          | 155     | 34%        | 16       | 16 | 100%       |  |  |  |
| vocal process(es) ulceration                                                                                           |                                                  |    |    |      | 21          |    | 19 |     |          |    |      |                                                |     |            | 40          | 112     | 36%        |          |    |            |  |  |  |
| <b>TOTALS</b>                                                                                                          |                                                  |    |    |      |             |    |    |     |          |    |      | 70                                             | 292 | 24%        | 174         | 534     | 33%        | 16       | 16 | 100%       |  |  |  |
| <b>GRADE III</b>                                                                                                       |                                                  |    |    |      |             |    |    |     |          |    |      |                                                |     |            |             |         |            |          |    |            |  |  |  |
| <b>Stenosis, stenosis with glottis narrowing, hypomobility/immobility of the vocal folds and/or arytenoids complex</b> |                                                  |    |    |      |             |    |    |     |          |    |      |                                                |     |            |             |         |            |          |    |            |  |  |  |
| arytenoid(s) dislocation                                                                                               | 4                                                |    |    |      |             |    |    |     |          |    |      | 4                                              | 209 | 2%         |             |         |            |          |    |            |  |  |  |
| glottic stenosis                                                                                                       |                                                  |    |    | 0    |             |    |    |     | 4        | 7  |      | 0                                              | 50  | 0%         | 4           | 100     | 4%         | 7        | 50 | 14%        |  |  |  |
| paralysis                                                                                                              | 31                                               |    | 4  |      | 24          | 1  | 19 | 26  |          |    |      | 35                                             | 241 | 15%        | 70          | 267     | 26%        |          |    |            |  |  |  |
| subglottic mucosa edema                                                                                                |                                                  |    |    |      |             | 1  |    |     |          |    |      |                                                |     |            | 1           | 19      | 5%         |          |    |            |  |  |  |
| subglottic stenosis                                                                                                    |                                                  |    |    |      | 8           |    | 7  |     |          |    |      |                                                |     |            | 15          | 112     | 13%        |          |    |            |  |  |  |
| <b>TOTALS</b>                                                                                                          |                                                  |    |    |      |             |    |    |     |          |    |      | 39                                             | 500 | 8%         | 90          | 498     | 18%        | 7        | 50 | 14%        |  |  |  |
| <b>Symptoms</b>                                                                                                        |                                                  |    |    |      |             |    |    |     |          |    |      |                                                |     |            |             |         |            |          |    |            |  |  |  |
| dysphagia                                                                                                              | 117                                              |    | 3  |      | 3           | 34 |    |     |          |    |      | 120                                            | 241 | 50%        | 37          | 70      | 53%        |          |    |            |  |  |  |
| dysphonia                                                                                                              | 157                                              |    | 28 |      |             |    |    |     |          |    |      | 185                                            | 241 | 77%        |             |         |            |          |    |            |  |  |  |
| stridor                                                                                                                |                                                  |    |    |      | 1           |    | 10 |     |          |    |      |                                                |     |            | 11          | 155     | 7%         |          |    |            |  |  |  |
| laryngeal dyspnea                                                                                                      | 48                                               |    |    |      | 12          |    |    |     |          |    |      | 48                                             | 209 | 23%        | 12          | 19      | 63%        |          |    |            |  |  |  |
| pain                                                                                                                   | 170                                              |    | 14 |      |             |    |    |     |          |    |      | 184                                            | 241 | 76%        |             |         |            |          |    |            |  |  |  |
| <b>TOTALS</b>                                                                                                          |                                                  |    |    |      |             |    |    |     |          |    |      | 537                                            | 932 | 58%        | 60          | 244     | 25%        | -        | -  | -          |  |  |  |
